# Supplementary material
Source: Research Square preprint supplement (doi:10.21203/rs.3.rs-10261616/v1)
Supplement: Supplementary file 1 [file c962415e8038a0f4e2a5cd67.docx]

Supporting Information

**Enhanced High-Rate Capability of LiNi0.83Co0.11Mn0.06O2 Cathodes by Homogeneous Sr2+ Doping**

***Teng Ma1, Zhikun Zhang1, Junjie Zhang1, Shuaijie Li1, Renfei Liu1, fangchun Luo2, Lili Zhang3, Zhen Xu1, Fuqiang Guo1*, Baohua Zhang1****

1. Xinjiang Key Laboratory of High Value Green Utilization of Low-rank Coal,

School of Physics and Materials Science, Changji University, Xinjiang, Changji

831100, China

1. School of Foreign Languages, Changji University, Xinjiang, Changji 831100, China
2. Xinjiang Key Laboratory of Phase Transitions and Microstructures in Condensed Matters, College of Physical Science and Technology, Yili Normal University, Xinjiang, Yining 835000, China

*Corresponding authors.

*E-mail: cjxyedu@163.com (Prof. Fuqiang Guo), zbhcjxy@163.com (Baohua Zhang).

**PartⅠ: Supporting Figures**


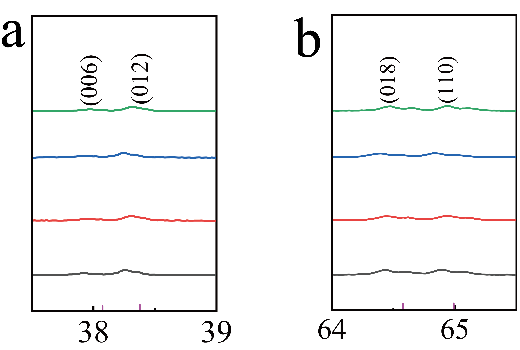


**Fig. S1** (a) (003) peaks, (b) (104) peaks.


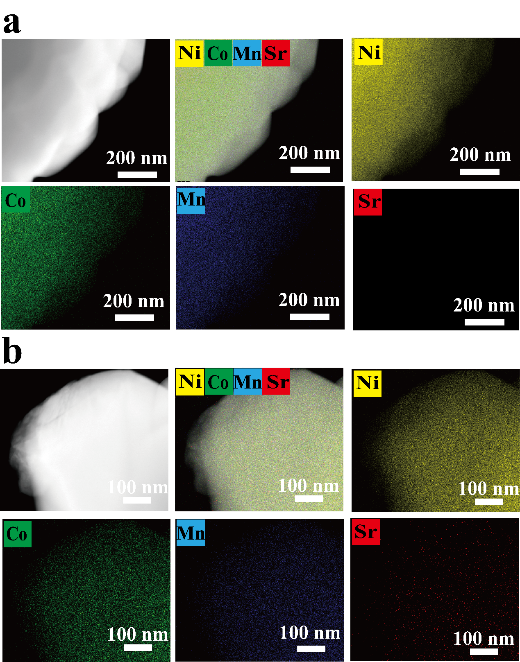


**Fig.S2** EDS mapping results for NCM-Sr-0 (a); EDS mapping results for NCM-Sr-0.7 (b).


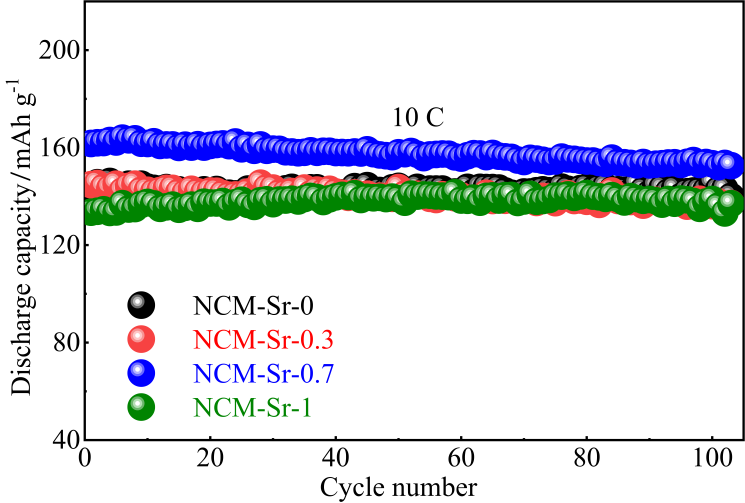


Fig.S3 long multiplicity performance of NCM-Sr-X at 10C


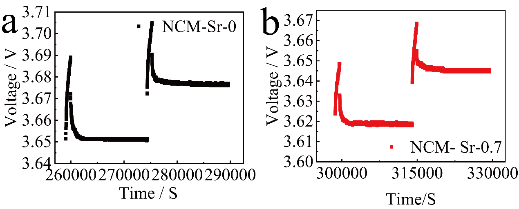


**Fig.S4** (a) NCM-Sr-0-GITT and (b) NCM-Sr-0.7-GITT charging curve .


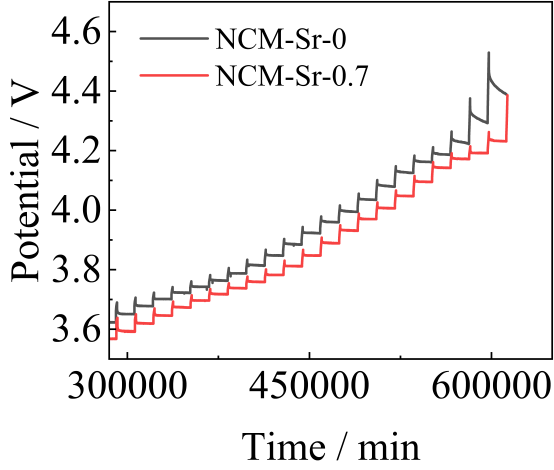


**Fig. S5**. NCM-Sr-0 and NCM-Sr-0.7-GITT charging curve .

For the GITT measurement, the assembled coin-type half-cells were firstly galvanostatic charge/discharged at a constant current of 0.1C for 3 cycles. Subsequently, the charging interval was set, and the open circuit lasted 4 h to allow the cell voltage to relax to its quasi-equilibrium state. The change in the steady-state voltage ΔEs is obtained by subtracting the original voltage (E0) from the steady-state voltage (Es). The cell voltage increases during the current flux and the total change of cell voltage ΔEτ can be obtained by calculating the voltage drop. Meanwhile, the process of the chemical diffusion is assumed to obey Fick’s second law of diffusion. With a series of simplifications, for sufficient time interval (τ<<L2/DLi+), the equation of DLi+ can be written as (Equation 1):

where Vm is the molar volume of active materials, MB and mB are the molecular weight and mass of the host oxide, respectively, and A is the total contact area between the electrolyte and the electrode, L is the thickness of the electrode. If sufficiently small currents and short time intervals are employed, the cell voltage is a linear function of the square root of τ, Equation 1 can be further simplified as (Equation 2):

where ΔEs is the value of subtracting the original voltage (E0) from the steady-state voltage (Es). ΔEτ is the change in the total temporary potential during the application of current in τ, L is the thickness of the electrode.


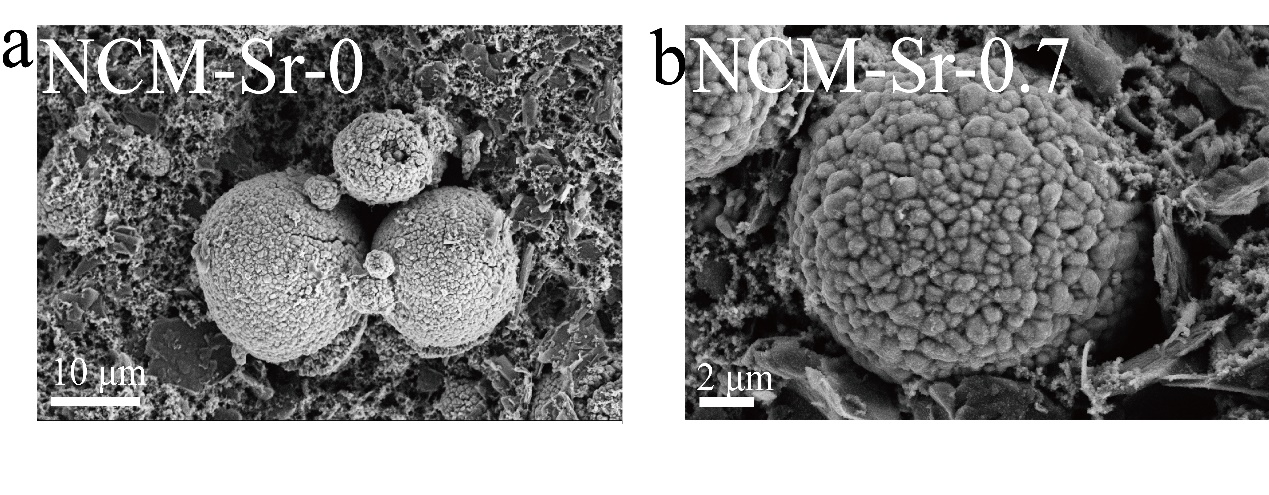
 **Fig. S5.** the SEM images Of (a) NCM-Sr-0 and (b)NCM-Sr-0.7 after 100 cycles;

**Table. S2** Precise impedance parameters of raw and Sr samples after different number of cycles.

| NCM-Sr-0 | Rs | Rf | Rct | NCM-Sr-0.7 | Rs | Rf | Rct |
| --- | --- | --- | --- | --- | --- | --- | --- |
| 3th | 4.113 | 12.19 | 12.19 | 3th | 4.1 | 12.125 | 12.46 |
| 50th | 4.432 | 8.725 | 24.22 | 50th | 4.2 | 7.055 | 36.73 |
| 100th | 5.364 | 10.38 | 46.43 | 100th | 5.6 | 12.43 | 62.86 |
